# Supplementary material for: A facile and simple phase-inversion method for the fabrication of Ag nanoparticles/multi-walled carbon nanotubes/poly(vinylidene fluoride) nanocomposite with high-efficiency of electrocatalytic property
Source: Royal Society of Chemistry journal article supplement (doi:10.1039/c1ra00672j), 2011-12-20
Supplement: c1ra00672j.pdf [file c1ra00672j.pdf]

## Supporting Information

### The calculation about the loading of the Ag NPs

$$\frac{\Delta m}{m_0} = \frac{m - m_0}{m_0} = \frac{0.08\% - 0.03\%}{0.03\%} = 1.66$$

Where,  $m_0$  is the loading of the Ag NPs onto the Ag NPs/PVDF composite, i.e. the atomic concentration of Ag in the Ag NPs/PVDF composite by XPS;  $m$  is the loading of the Ag NPs onto the Ag NPs/MWCNTs/PVDF composite, i.e. the atomic concentration of Ag in the Ag NPs/MWCNTs/PVDF composite by XPS.

**Table S1.** D- and G-bands shifts and Raman  $I_D/I_G$  intensity ratios of purified MWCNTs, MWCNTs/PVDF and Ag NPs/MWCNTs/PVDF composites.

| Sample           | D-band<br>[cm <sup>-1</sup> ] | G-band<br>[cm <sup>-1</sup> ] | $I_D/I_G$ |
|------------------|-------------------------------|-------------------------------|-----------|
| purified MWNTs   | 1352                          | 1585                          | 0.88      |
| MWNTs/PVDF       | 1353                          | 1586                          | 1.03      |
| AgNPs/MWNTs/PVDF | 1353                          | 1586                          | 1.31      |

**Table S2.** DSC parameters of the PVDF, Ag NPs/PVDF, MWCNTs/PVDF and Ag NPs/MWCNTs/PVDF composites

| Sample              | $\Delta H_m$<br>[J/g] <sup>a)</sup> | $\Delta H_c$<br>[J/g] <sup>b)</sup> | $T_m$<br>[°C] <sup>c)</sup> | $T_c$<br>[°C] <sup>d)</sup> | $X_c$<br>[%] <sup>e)</sup> |
|---------------------|-------------------------------------|-------------------------------------|-----------------------------|-----------------------------|----------------------------|
| PVDF                | 50.96                               | 37.35                               | 162                         | 139                         | 48.72                      |
| MWCNTs/PVDF         | 25.71                               | 21.00                               | 162                         | 139                         | 24.58                      |
| Ag NPs/PVDF         | 45.64                               | 34.81                               | 162                         | 139                         | 43.63                      |
| Ag NPs/MWCNTs /PVDF | 25.53                               | 21.80                               | 162                         | 140                         | 24.41                      |

<sup>a)</sup>the melting enthalpy of the first heating trace; <sup>b)</sup>the crystallization enthalpy of the cooling trace; <sup>c)</sup>the melting peak temperature; <sup>d)</sup>the crystallization temperature; <sup>e)</sup>the degree of mass crystallinity

To derive the information of sample crystallinity from the DSC results, the degree of mass crystallinity ( $X_c$ ) was calculated from the melting enthalpy of the second heating trace ( $\Delta H_m$ ) with the following Equation 1:

$$X_c (\%) = \frac{\Delta H_m}{\Delta H_0} \quad (1)$$

where  $\Delta H_0=104.6$  J/g was the heat of fusion for 100% crystalline PVDF.

**Table S3.** The  $T_i$ ,  $T_{max}$  and Weight loss rate at  $T_{max}$  observed from **Figure S1**

| Samples           | $T_i$<br>[°C] <sup>a)</sup> | $T_{max}$<br>[°C] <sup>b)</sup> | Weight loss rate at $T_{max}$<br>(%) |
|-------------------|-----------------------------|---------------------------------|--------------------------------------|
| PVDF              | 405.98                      | 486.49                          | 53.26%                               |
| MWCNTs/PVDF       | 346.15                      | 484.97                          | 36.89%                               |
| Ag NPs/ PVDF      | 368.27                      | 478.87                          | 39.78%                               |
| AgNPs/MWCNTs/PVDF | 359.80                      | 479.63                          | 36.51%                               |

<sup>a)</sup>the initial degradation temperature; <sup>b)</sup>the temperature at the highest degradation rate

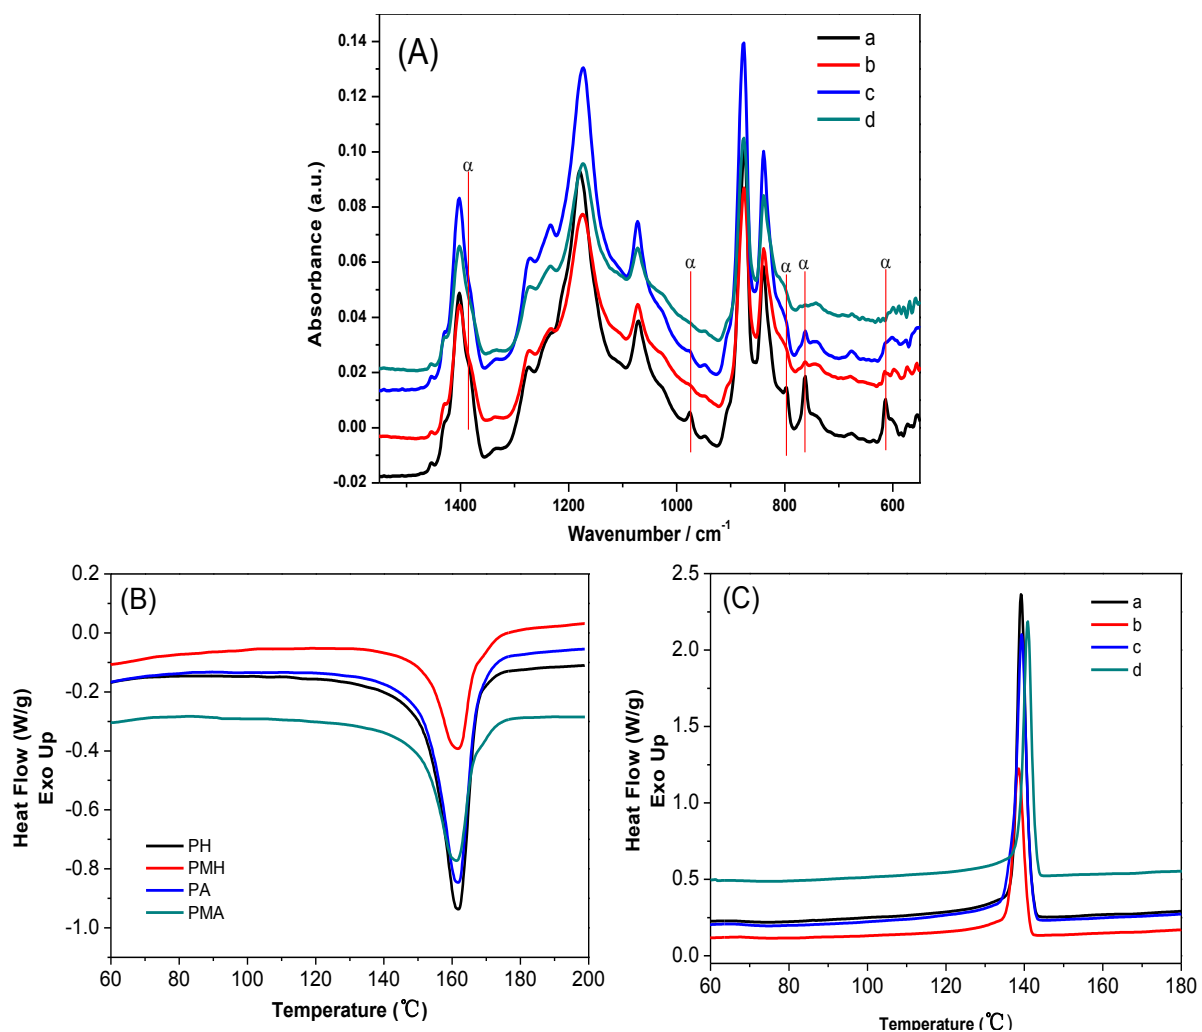

**Fig. S1** FTIR spectra(A) and DSC heating (B) and cooling (C) curves of the PVDF(a), MWCNTs/PVDF(b), Ag NPs/PVDF(c) and Ag NPs/MWCNTs/PVDF(d) composites.

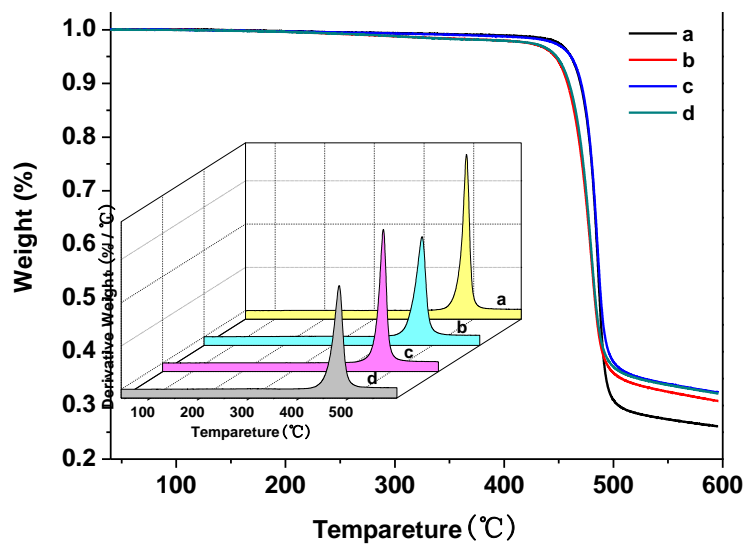

**Fig. S2** TG and derivative TG (inset) curves of the PVDF(a), Ag NPs/ PVDF(b), MWCNTs/PVDF(c) and Ag NPs/ MWCNTs/PVDF(d) composites.
